# Supplementary material for: Highly efficient nanosized Mn and Fe codoped ceria-based solid solutions for elemental mercury removal at low flue gas temperatures
Source: Royal Society of Chemistry journal article supplement (doi:10.1039/c5cy00231a), 2015-01-01
Supplement: c5cy00231a1.pdf [file c5cy00231a1.pdf]

## Electronic supporting information

### **Highly efficient nanosized Mn and Fe codoped ceria-based solid solutions for elemental mercury removal at low flue gas temperatures**

**Deshetti Jampaiah<sup>a,b</sup>, Samuel J. Ippolito<sup>b</sup>, Ylias M. Sabri<sup>b</sup>, Benjaram M. Reddy<sup>a,\*</sup> and Suresh K. Bhargava<sup>b,\*</sup>**

*<sup>a</sup>RMIT-IICT Joint Research Centre, CSIR-Indian Institute of Chemical Technology, Uppal Road, Hyderabad – 500 007, India*

*<sup>b</sup>Centre for Advanced Materials & Industrial Chemistry (CAMIC), School of Applied Sciences, RMIT University, GPO BOX 2476, Melbourne – 3001, Australia*

\*Corresponding Authors

E-mail: [bmreddy@iict.res.in](mailto:bmreddy@iict.res.in); Fax: +91 40 2716 0921; Tel: +91 40 27193510

E-mail: [suresh.bhargava@rmit.edu.in](mailto:suresh.bhargava@rmit.edu.in); Tel: +61 3 9925 3365

**Table S1** The chemical compositions of elements of  $\text{Ce}_{0.7}\text{Mn}_{0.3}\text{O}_{2-\delta}$  (CM),  $\text{Ce}_{0.65}\text{Mn}_{0.3}\text{Fe}_{0.05}\text{O}_{2-\delta}$  (CMF5),  $\text{Ce}_{0.6}\text{Mn}_{0.3}\text{Fe}_{0.1}\text{O}_{2-\delta}$  (CMF10),  $\text{Ce}_{0.55}\text{Mn}_{0.3}\text{Fe}_{0.15}\text{O}_{2-\delta}$  (CMF15), and  $\text{Ce}_{0.5}\text{Mn}_{0.3}\text{Fe}_{0.2}\text{O}_{2-\delta}$  (CMF20) catalysts.

| Sample | Nominal values |     |      | Actual values from ICP-OES analysis |      |      | Chemical formulae                                                     |
|--------|----------------|-----|------|-------------------------------------|------|------|-----------------------------------------------------------------------|
|        | Ce             | Mn  | Fe   | Ce                                  | Mn   | Fe   |                                                                       |
| CM     | 0.7            | 0.3 | -    | 0.69                                | 0.31 | -    | $\text{Ce}_{0.69}\text{Mn}_{0.31}\text{O}_{2-\delta}$                 |
| CMF5   | 0.65           | 0.3 | 0.05 | 0.61                                | 0.32 | 0.07 | $\text{Ce}_{0.61}\text{Mn}_{0.32}\text{Fe}_{0.07}\text{O}_{2-\delta}$ |
| CMF10  | 0.6            | 0.3 | 0.10 | 0.58                                | 0.34 | 0.08 | $\text{Ce}_{0.58}\text{Mn}_{0.34}\text{Fe}_{0.08}\text{O}_{2-\delta}$ |
| CMF15  | 0.55           | 0.3 | 0.15 | 0.54                                | 0.32 | 0.13 | $\text{Ce}_{0.54}\text{Mn}_{0.32}\text{Fe}_{0.13}\text{O}_{2-\delta}$ |
| CMF20  | 0.50           | 0.3 | 0.20 | 0.51                                | 0.32 | 0.17 | $\text{Ce}_{0.51}\text{Mn}_{0.32}\text{Fe}_{0.17}\text{O}_{2-\delta}$ |

**Table S2** The surface atomic concentrations and binding energies of  $\text{CeO}_2$ ,  $\text{Ce}_{0.7}\text{Mn}_{0.3}\text{O}_{2-\delta}$  (CM),  $\text{Ce}_{0.65}\text{Mn}_{0.3}\text{Fe}_{0.05}\text{O}_{2-\delta}$  (CMF5),  $\text{Ce}_{0.6}\text{Mn}_{0.3}\text{Fe}_{0.1}\text{O}_{2-\delta}$  (CMF10),  $\text{Ce}_{0.55}\text{Mn}_{0.3}\text{Fe}_{0.15}\text{O}_{2-\delta}$  (CMF15), and  $\text{Ce}_{0.5}\text{Mn}_{0.3}\text{Fe}_{0.2}\text{O}_{2-\delta}$  (CMF20) catalysts.

| Sample         | $\text{Ce}^{3+}/\text{Ce}^{3+}+\text{Ce}^{4+}$ (%) | O 1s centre (eV) |                 |                  |
|----------------|----------------------------------------------------|------------------|-----------------|------------------|
|                |                                                    | O <sub>I</sub>   | O <sub>II</sub> | O <sub>III</sub> |
| $\text{CeO}_2$ | 12.6                                               | 530.4            | 531.9           | -                |
| CM             | 16.51                                              | 529.1            | 531.4           | 532.9            |
| CMF5           | 19.13                                              | 529.0            | 531.4           | 533.1            |
| CMF10          | 26.46                                              | 528.9            | 530.6           | 533.2            |
| CMF15          | 30.87                                              | 528.7            | 531.3           | 533.6            |
| CMF20          | 37.01                                              | 528.5            | 530.4           | 533.4            |

O<sub>I</sub> = lattice oxygen; O<sub>II</sub> = surface adsorbed oxygen; O<sub>III</sub> = chemisorbed water and/or carbonates

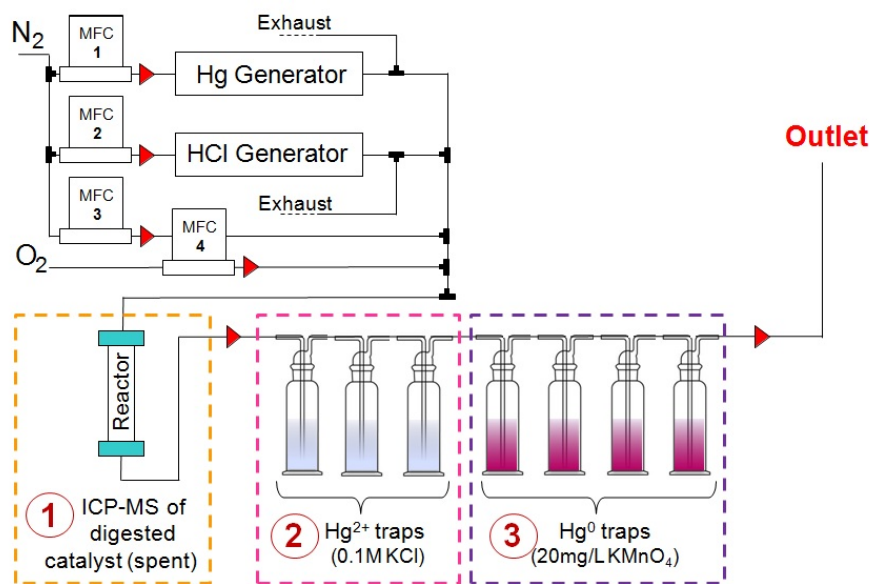

Fig. S1. Schematic experimental diagram set up.

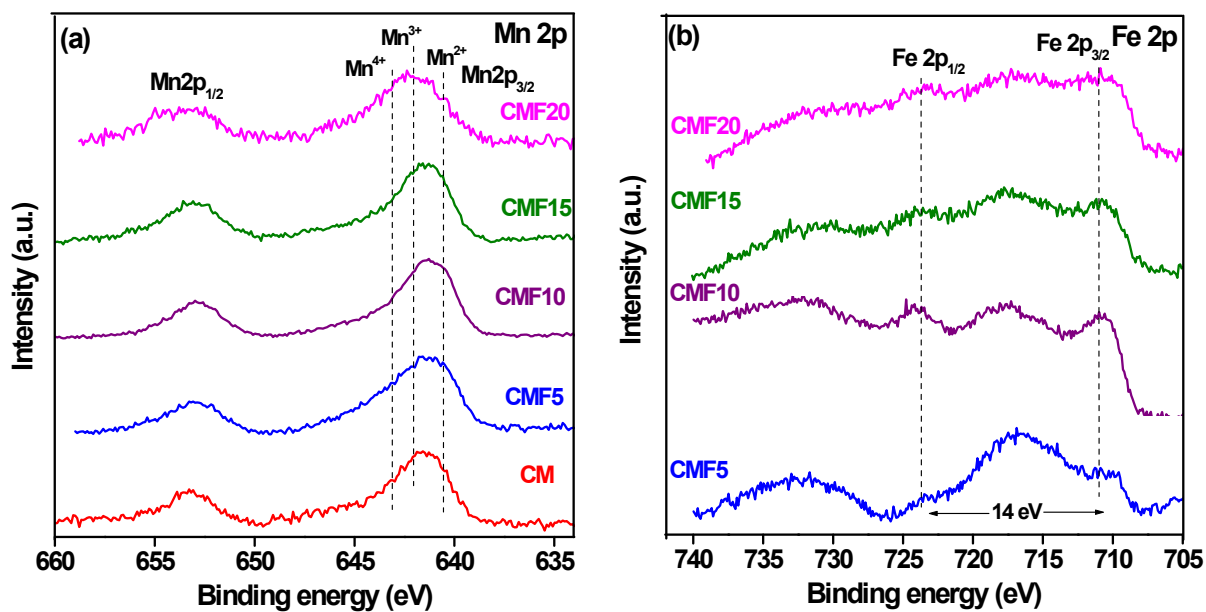

Fig. S2(a) Mn 2p (b) Fe 2p XPS spectra of  $\text{CeO}_2$ ,  $\text{Ce}_{0.7}\text{Mn}_{0.3}\text{O}_{2-\delta}$  (CM),  $\text{Ce}_{0.65}\text{Mn}_{0.3}\text{Fe}_{0.5}\text{O}_{2-\delta}$  (CMF5),  $\text{Ce}_{0.6}\text{Mn}_{0.3}\text{Fe}_{0.1}\text{O}_{2-\delta}$  (CMF10),  $\text{Ce}_{0.55}\text{Mn}_{0.3}\text{Fe}_{0.15}\text{O}_{2-\delta}$  (CMF15), and  $\text{Ce}_{0.5}\text{Mn}_{0.3}\text{Fe}_{0.2}\text{O}_{2-\delta}$  (CMF20) catalysts.

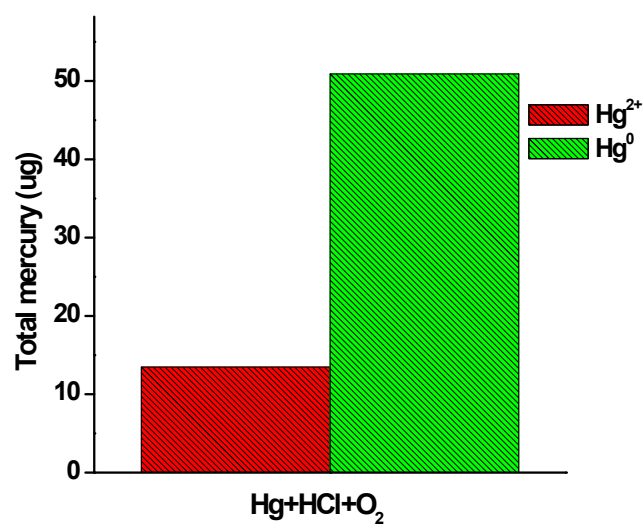

Fig. S3 Mercury speciation in presence of HCl and O<sub>2</sub> gas conditions without catalyst.

It can be observed that ~16 % of the Hg<sup>0</sup> is oxidised without the presence of a catalyst. This may be due to the presence of gas species that promote Hg<sup>0</sup> oxidation, namely HCl and O<sub>2</sub>.

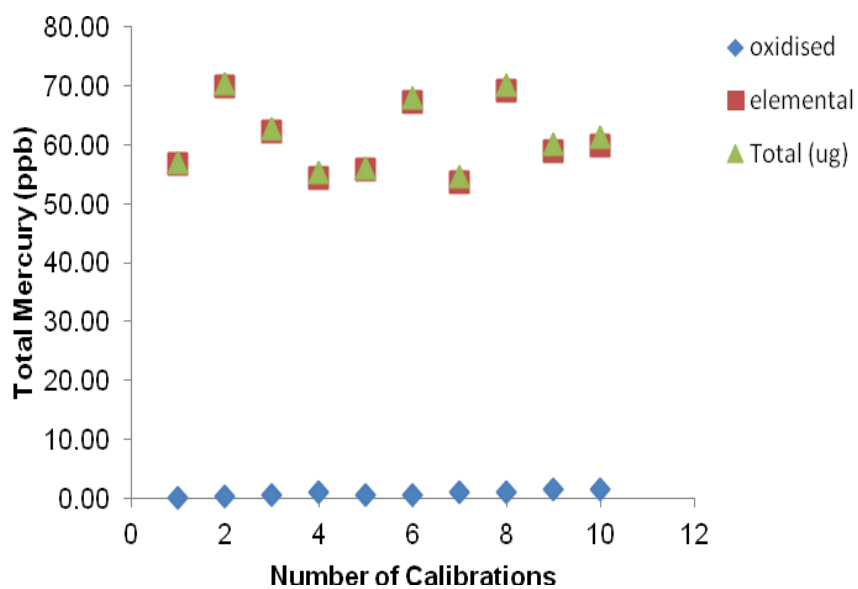

**Fig. S4** The calibration experiments for total amount of inlet mercury ( $\text{Hg}^0_{\text{inlet}}$ ).

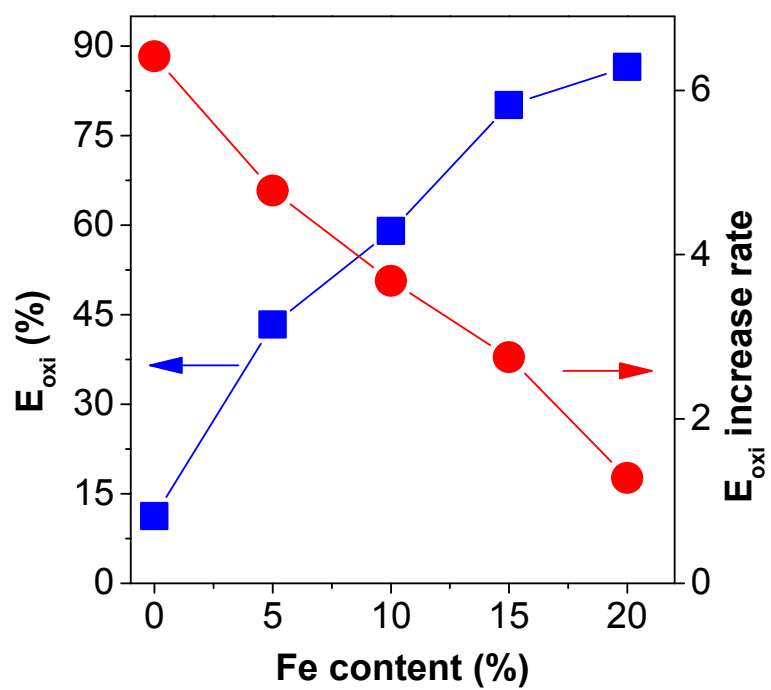

Fig. S5 The relation between  $E_{\text{oxi}}$  and rate of increase in  $E_{\text{oxi}}$  with respect to the Fe content in the presence of HCl and  $\text{Hg}^0$ .
